# Supplementary material for: Assessment of Residuality of Hymexazol in Strawberry (Fragaria × ananassa) Crop by a Modified QuEChERS Method and Liquid Chromatography Tandem-Mass Spectrometry
Source: MDPI journal article supplement (doi:10.3390/agronomy12123110), 2022-12-08
Supplement: s1 [file s1]

# Assessment of dissipation of hymexazol in strawberry (*Fragaria × ananassa*) Crop by a modified QuEChERS method and and Liquid Chromatography Tandem-Mass Spectrometry

Manuel Alonzo Báez-Sañudo, Luis Alfonso Jiménez-Ortega, and Pedro de Jesús Bastidas-Bastidas

## Supplementary material

**Table S1.** Conditions of MS/MS

| Analyte   | Precursor<br>m/z | Product<br>m/z | Dwell<br>(s) | Cone<br>(V) | Collision<br>(V) |
|-----------|------------------|----------------|--------------|-------------|------------------|
| Hymexazol | 100.2            | 43.9           | 0.025        | 24          | 12               |
|           |                  | 53.8           | 0.025        | 24          | 10               |

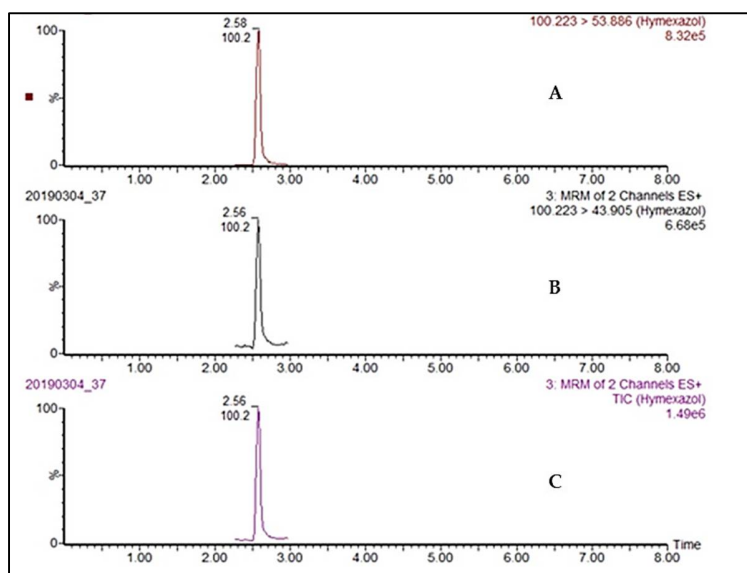

**Figure S1.** Ion transitions. (A) Precursor (B, C) Products of hymexazol. A concentration of 1.0231 mg/L was injected.

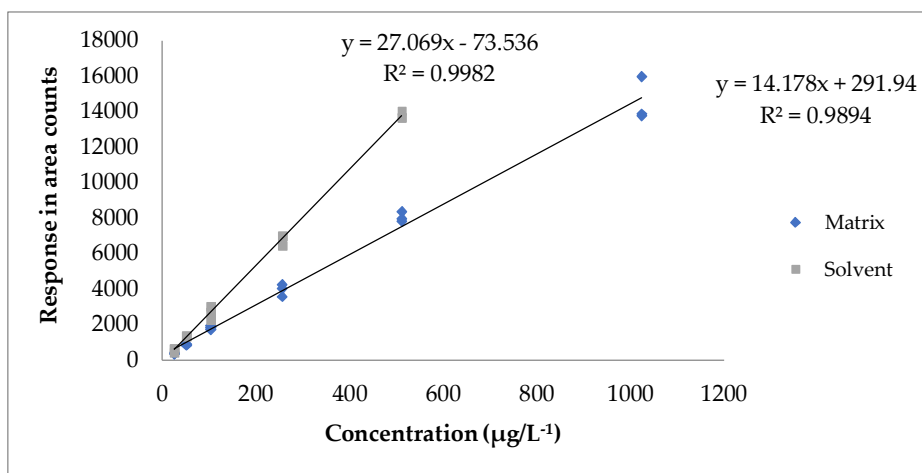

Figure S2. System linearity of matrix effect of strawberry fruit

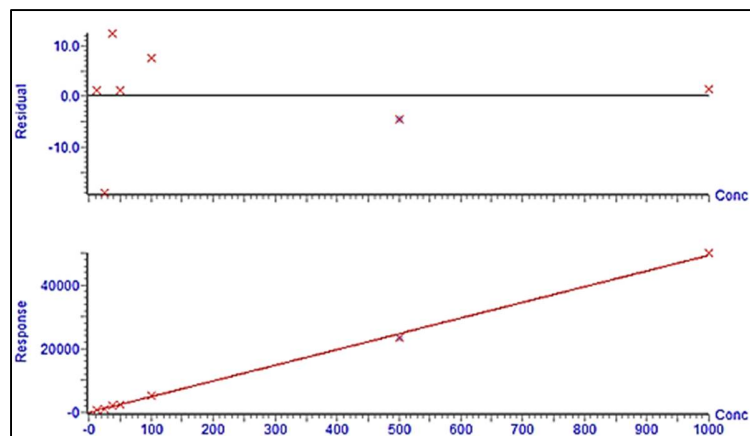

Figure S3. System Linearity

**Table S2.** Evaluation of the Chi square statistic for repeatability

| Repeatability           |         |         |         |         |         |
|-------------------------|---------|---------|---------|---------|---------|
| Identification          | Level 1 | Level 2 | Level 3 | Level 4 | Level 5 |
| A                       | 123.14  | 89.66   | 100.91  | 95.32   | 107.57  |
| B                       | 72.18   | 91.97   | 100.06  | 92.74   | 108.81  |
| C                       | 77.42   | 98.27   | 101.57  | 93.97   | 109.49  |
| Average                 | 90.91   | 93.30   | 100.85  | 94.01   | 108.62  |
| Standard deviation      | 28.03   | 4.45    | 0.76    | 1.29    | 0.98    |
| Standard deviation ^2   | 785.542 | 19.839  | 0.573   | 1.662   | 0.952   |
| Great average           |         |         | 97.54   |         |         |
| N                       |         |         | 15      |         |         |
| n                       |         |         | 3       |         |         |
| k                       |         |         | 5       |         |         |
| gl                      |         |         | 8       |         |         |
| σ2                      |         |         | 161.714 |         |         |
| Identification          | Level 1 | Level 2 | Level 3 | Level 4 | Level 5 |
| A                       | 655.14  | 62.05   | 11.39   | 4.92    | 100.53  |
| B                       | 642.94  | 30.99   | 6.36    | 22.99   | 126.98  |
| C                       | 404.72  | 0.53    | 16.26   | 12.73   | 142.83  |
| SUM                     |         |         | 2241.37 |         |         |
| S²                      |         |         | 149.424 |         |         |
| X²calculated            |         |         | 12.94   |         |         |
| X²tables                |         |         | 15.51   |         |         |
| X²calculated< X² tables |         |         |         |         |         |

**Table S3.** Analysis of variance for one factor with random effects

| Reproducibility                    |                      |                       |                              |                      |                       |
|------------------------------------|----------------------|-----------------------|------------------------------|----------------------|-----------------------|
|                                    | First test<br>(% R1) | Second test<br>(% R2) |                              | First test<br>(% R1) | Second test<br>(% R2) |
| L-1 A                              | 88.6                 | 82.3                  | L-1 A                        | 128.6                | 150.3                 |
| L-1 B                              | 106.8                | 73.7                  | L-1 B                        | 48.1                 | 434.8                 |
| L-1 C                              | 103.9                | 82.3                  | L-1 C                        | 15.9                 | 150.6                 |
| L-2 A                              | 89.6                 | 99.3                  | L-2 A                        | 105.8                | 22.3                  |
| L-2 B                              | 91.9                 | 96.6                  | L-2 B                        | 63.6                 | 3.9                   |
| L-2 C                              | 98.                  | 101.3                 | L-2 C                        | 2.8                  | 45.6                  |
| L-3 A                              | 104.0                | 95.5                  | L-3 A                        | 16.9                 | 0.8                   |
| L-3 B                              | 103.1                | 98.7                  | L-3 B                        | 10.4                 | 16.6                  |
| L-3 C                              | 104.7                | 101.1                 | L-3 C                        | 22.9                 | 42.3                  |
| L-4 A                              | 95.3                 | 98.3                  | L-4 A                        | 21.4                 | 14.0                  |
| L-4 B                              | 92.7                 | 98.4                  | L-4 B                        | 51.8                 | 14.6                  |
| L-4 C                              | 93.9                 | 101.3                 | L-4 C                        | 35.7                 | 45.5                  |
| L-5 A                              | 107.5                | 96.2                  | L-5 A                        | 58.0                 | 2.4                   |
| L-5 B                              | 108.8                | 95.2                  | L-5 B                        | 78.4                 | 0.3                   |
| L-5 C                              | 109.4                | 98.                   | L-5 C                        | 91.0                 | 15.4                  |
| Average(xj)                        | 99.9                 | 94.6                  | Sum                          | 1712.1               |                       |
| Great mean                         | 97.2                 |                       | S <sub>DM</sub> <sup>2</sup> | 68.3                 |                       |
| S <sub>EM</sub> <sup>2</sup>       |                      |                       | 211.7                        |                      |                       |
| Fcalculated                        |                      |                       | 3.098                        |                      |                       |
| F <sub>tables</sub><br>(1,15,0.05) |                      |                       | 4.543                        |                      |                       |
| Fcalculated < F <sub>tables</sub>  |                      |                       |                              |                      |                       |

L (Level); 1 (25  $\mu$ L of mixture of concentration 10.2312 ng/ $\mu$ L); 2 (50  $\mu$ L of mixture of concentration 10.2312 ng/ $\mu$ L); 3 (100  $\mu$ L of mixture of concentration 10.2312 ng/ $\mu$ L); 4 (300  $\mu$ L of mixture of concentration 10.2312 ng/ $\mu$ L); 5 (500  $\mu$ L of mixture of concentration 10.2312 ng/ $\mu$ L). A (First replicate); B (Second replicate); C (Third replicate).

**Table S4.** Method accuracy

| Accuracy                                      |                   |                                          |                    |
|-----------------------------------------------|-------------------|------------------------------------------|--------------------|
| Identification                                | First test (% R1) | Identification                           | Second test (% R2) |
| L-1 A                                         | 88.6              | L-1 A                                    | 82.3               |
| L-1 B                                         | 106.8             | L-1 B                                    | 73.7               |
| L-1 C                                         | 103.9             | L-1 C                                    | 82.3               |
| L-2 A                                         | 89.6              | L-2 A                                    | 99.3               |
| L-2 B                                         | 91.9              | L-2 B                                    | 96.6               |
| L-2 C                                         | 98.2              | L-2 C                                    | 101.3              |
| L-3 A                                         | 104.0             | L-3 A                                    | 95.5               |
| L-3 B                                         | 103.1             | L-3 B                                    | 98.7               |
| L-3 C                                         | 104.7             | L-3 C                                    | 101.1              |
| L-4 A                                         | 95.3              | L-4 A                                    | 98.3               |
| L-4 B                                         | 92.7              | L-4 B                                    | 98.4               |
| L-4 C                                         | 93.9              | L-4 C                                    | 101.3              |
| L-5 A                                         | 107.5             | L-5 A                                    | 96.2               |
| L-5 B                                         | 108.8             | L-5 B                                    | 95.23              |
| L-5 C                                         | 109.4             | L-5 C                                    | 98.5               |
| <b>Average</b>                                | 99.9              | <b>Average</b>                           | 94.6               |
| Standard deviation                            | 7.3               | Standard deviation                       | 8.2                |
| <b>CV</b>                                     | 7.3               | <b>CV</b>                                | 8.7                |
| <b>IC</b>                                     | 3.7               | <b>IC</b>                                | 4.1                |
| <b>IC (u) [-]</b>                             | 96.2              | <b>IC (u) [-]</b>                        | 90.4               |
| <b>IC (u) [+]</b>                             | 103.6             | <b>IC (u) [+]</b>                        | 98.8               |
| <b>n</b>                                      | 30                | <b>Range Accuracy (90.443 - 103.657)</b> |                    |
| <b>Great mean</b>                             |                   |                                          | 97.2               |
| <b>Total SD</b>                               |                   |                                          | 8.1                |
| <b>Hypothesis u<sub>0</sub></b>               |                   |                                          | 98                 |
| <b>t<sub>calculate</sub></b>                  |                   |                                          | -0.477             |
| <b>t<sub>tables</sub>(0.975,29)</b>           |                   |                                          | ±2.045             |
| <b>-2.045 ≤ t<sub>calculate</sub> ≤ 2.045</b> |                   |                                          |                    |

L (Level); 1 (25 µL of mixture of concentration 10.2312 ng/µL); 2 (50 µL of mixture of concentration 10.2312 ng/µL); 3 (100 µL of mixture of concentration 10.2312 ng/µL); 4 (300 µL of mixture of concentration 10.2312 ng/µL); 5 (500 µL of mixture of concentration 10.2312 ng/µL). A (First replicate); B (Second replicate); C (Third replicate).

**Table S5.** Equations for calculate the LOD and LOQ

| Equations for calculate the LOD and LOQ |
|-----------------------------------------|
| LOD = t <sub>0.99</sub> *SD             |
| LOQ = 3*LOD                             |

LOD= t<sub>0.99</sub>\*SD (t<sub>0.99</sub> = 3.365; one-tailed Student's t-table value with 5 degrees of freedom (n=6) and 99% confidence degree).
